# Supplementary material for: Identification of lncRNAs by RNA Sequencing Analysis During in Vivo Pre-Implantation Developmental Transformation in the Goat
Source: Front Genet. 2019 Oct 25;10:1040. doi: 10.3389/fgene.2019.01040 (PMC6823246; doi:10.3389/fgene.2019.01040)
Supplement: Supplemental Table S3 — Primer pairs used to qRT-PCR amplification. [file Table_3.xlsx]

## Sheet: Sheet1
Gene ID	Primer	Sequence	Size(bp)
TCONS_02724008	SC2-F	CCTAGATCCTACTGCATTGC	144
	SC2-R	GGGTTTTAAGGTGCAGTTCC
TCONS_00924431	SC4-F	AGCTTGTGCTGAAGTGCTAG	138
	SC4-R	CCTCTGGTATCTAAGGCTAC
TCONS_03044506	SC8-F	AGCACAGGCTCAATAATTGC	143
	SC8-R	GTTTAGAGCTTCCCTGGTTG
TCONS_02118804	SC9-F	TTAGGTAGAGTCCTGCAGAG	133
	SC9-R	ATCAGGATCTGCAAAGCACC
TCONS_02500103	SC11-F	CAGCTTTGCAGTTAGCAATG	162
	SC11-R	ACCTGCAATGCAGTAGGATC
TCONS_05277833	SC12-F	CTGGATTGAGGAGAGAAGAG	154
	SC12-R	TCAGGAAGATTCCCATGGAG
loading control	Sense	TGCCAAGTATGATGAGAT
	Antisense	TCAGTGTAGCCTAGAATG
